# Supplementary material for: Slc26a1 is not essential for spermatogenesis and male fertility in mice
Source: PeerJ journal article supplement (doi:10.7717/peerj.16558), 2023-12-15

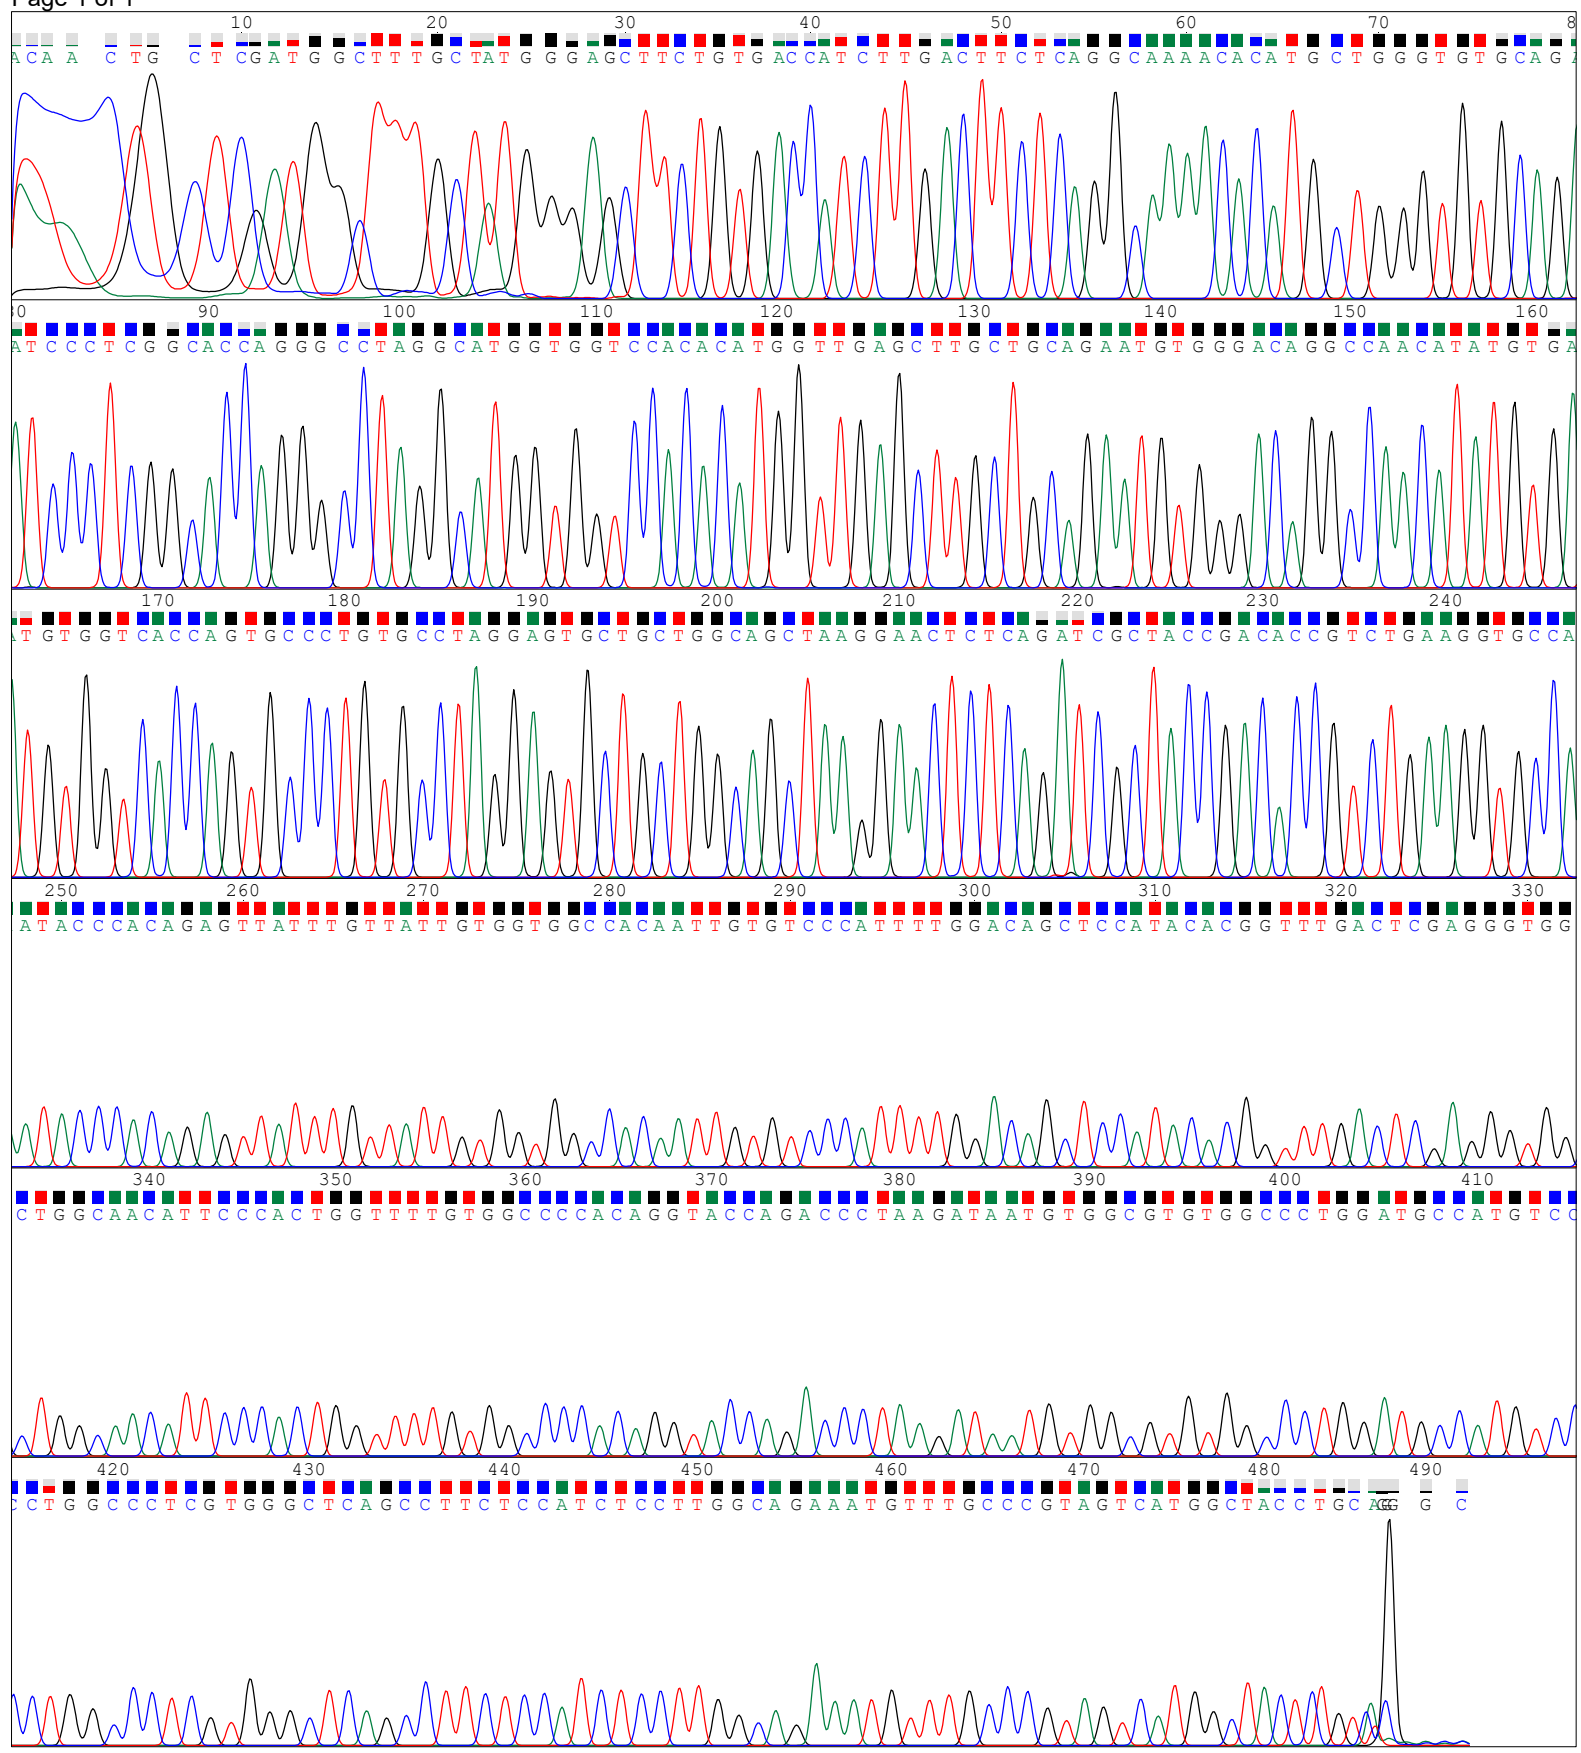

Supplement: sanger_sequence-WT.pdf [file sanger_sequence-WT.pdf]
